# Supplementary material
Source: bioRxiv or medRxiv preprint supplement (https://medrxiv.org/highwire/filestream/72980/field_highwire_adjunct_files/1/2020.03.01.20029397-2.pdf)

# 重庆三峡中心医院伦理委员会 科研项目审查表

批件号：年科研第（13）号

|                                                                                                                                                                                                                                                                                                                                      |                                                                                                                |            |              |
|--------------------------------------------------------------------------------------------------------------------------------------------------------------------------------------------------------------------------------------------------------------------------------------------------------------------------------------|----------------------------------------------------------------------------------------------------------------|------------|--------------|
| 审查项目名称                                                                                                                                                                                                                                                                                                                               | 重庆市 2019-nCov 肺炎患者流行病学和临床特征的多中心描述性回顾分析                                                                         |            |              |
| 医疗机构名称                                                                                                                                                                                                                                                                                                                               | 重庆三峡中心医院                                                                                                       |            |              |
| 审查科室                                                                                                                                                                                                                                                                                                                                 | 御安分院                                                                                                           | 项目负责人      | 向江琳          |
| 审查文件                                                                                                                                                                                                                                                                                                                                 | 1、伦理初始审查申请表<br>2、临床研究方案<br>3、免知情同意申请                                                                           |            |              |
| 评审委员                                                                                                                                                                                                                                                                                                                                 | 性别                                                                                                             | 专业及职称      | 单位           |
| 王易林                                                                                                                                                                                                                                                                                                                                  | 男                                                                                                              | 外科学、主任医师   | 重庆三峡中心医院     |
| 田继书                                                                                                                                                                                                                                                                                                                                  | 女                                                                                                              | 护理学、主任护师   | 重庆三峡中心医院     |
| 巫贵成                                                                                                                                                                                                                                                                                                                                  | 男                                                                                                              | 肝病学、副主任医师  | 重庆三峡中心医院     |
| 罗涌                                                                                                                                                                                                                                                                                                                                   | 男                                                                                                              | 内分泌学、主任医师  | 重庆三峡中心医院     |
| 黄道秋                                                                                                                                                                                                                                                                                                                                  | 女                                                                                                              | 药学、主任药师    | 重庆三峡中心医院     |
| 熊德海                                                                                                                                                                                                                                                                                                                                  | 男                                                                                                              | 普通外科学、主任医师 | 重庆三峡中心医院     |
| 谭晓燕                                                                                                                                                                                                                                                                                                                                  | 女                                                                                                              | 妇产学、主任医师   | 重庆三峡中心医院     |
| 曾文兵                                                                                                                                                                                                                                                                                                                                  | 男                                                                                                              | 影像学、主任医师   | 重庆三峡中心医院     |
| 舒宗建                                                                                                                                                                                                                                                                                                                                  | 女                                                                                                              | 护理学、副主任护师  | 重庆三峡中心医院     |
| 谭宁                                                                                                                                                                                                                                                                                                                                   | 男                                                                                                              | 法学、三级律师    | 重庆益安律师事务所    |
| 何启华                                                                                                                                                                                                                                                                                                                                  | 男                                                                                                              | 社区管理、无职称   | 重庆市万州区东方广场社区 |
| 委员意见                                                                                                                                                                                                                                                                                                                                 | 共 <u>11</u> 人      出席 <u>8</u> 人      投票 <u>8</u> 人      回避 <u>0</u> 人                                         |            |              |
|                                                                                                                                                                                                                                                                                                                                      | 同意 <u>8</u> 人      不同意 <u>0</u> 人      作必要的修正后同意 <u>0</u> 人<br>作必要修改后重审 <u>0</u> 人      终止或暂停已批准的试验 <u>0</u> 人 |            |              |
| 评审意见：<br><input checked="" type="checkbox"/> 同意 <input type="checkbox"/> 不同意 <input type="checkbox"/> 作必要的修正后同意 <input type="checkbox"/> 作必要的修改后重审 <input type="checkbox"/> 终止或暂停已批准的试验<br>经伦理委员会审核，该项目研究申请者所提交的材料齐全，参加该项目审查的伦理委员根据有关法律/法规、赫尔辛基宣言等伦理原则对该项目提交的文件进行审核，认为符合相关法律/法规，经表决，同意“重庆市 2019-nCov 肺炎患者流行病学和临床特征的多中心描述性回顾分析”在我院实施。 |                                                                                                                |            |              |
| 重庆三峡中心医院伦理委员会（签章）<br>日期：2020年2月26日                                                                                                                                                                                                                                                                                                   |                                                                                                                |            |              |

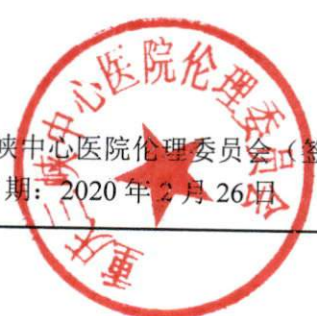

Supplement: Supplementary file [file 2020.03.01.20029397-2.pdf]
